# Supplementary material for: Adding function to the genome of African Salmonella Typhimurium ST313 strain D23580
Source: PubMed Central journal article supplement (PMC6333337; doi:10.1371/journal.pbio.3000059), 2019-01-15
Supplement: pbio.3000059.s009.pdf [file pbio.3000059.s009.pdf]

| Resource                                                                                                                                                       | Source     | Identifier        |
|----------------------------------------------------------------------------------------------------------------------------------------------------------------|------------|-------------------|
| <b>Bacterial Strains</b>                                                                                                                                       |            |                   |
| <i>Salmonella</i> Typhimurium 4/74 (ST19)                                                                                                                      | [1]        | JH3676            |
| <i>Salmonella</i> Typhimurium D23580 (ST313 lineage 2)                                                                                                         | [2]        | JH3621            |
| <i>Salmonella</i> Typhimurium 14028 (ST19)                                                                                                                     | L. Bossi   | MA5958 (JH3829)   |
| <i>Salmonella</i> Typhimurium D25248 (ST313 lineage 1)                                                                                                         | [2]        | IC24T             |
| <i>Salmonella</i> Typhimurium A130 (ST313 lineage 1)                                                                                                           | [2]        | IC24S             |
| <i>Salmonella</i> Typhimurium U3 (UK-ST313 strain)                                                                                                             | [3]        | IC25G             |
| <i>Salmonella</i> Typhimurium U2 (UK-ST313 strain)                                                                                                             | [3]        | IC25F             |
| <i>Salmonella</i> Typhimurium D37712 (ST313 lineage 2)                                                                                                         | [4]        | IC24O             |
| <i>Salmonella</i> Typhimurium D23580 <i>flhA</i> <sup>4/74</sup>                                                                                               | This study | JH4303            |
| <i>Salmonella</i> Typhimurium 4/74 <i>melB</i> <sup>-</sup> (contains the two D23580 <i>melB</i> SNPs)                                                         | This study | JH4304            |
| <i>Salmonella</i> Typhimurium 4/74 <i>melR</i> <sup>-</sup> (contains the D23580 <i>melR</i> SNP)                                                              | This study | JH4305            |
| <i>Salmonella</i> Typhimurium 4/74 <i>melB</i> <sup>-</sup> <i>melR</i> <sup>-</sup> (contains the two D23580 <i>melB</i> SNPs and the D23580 <i>melR</i> SNP) | This study | JH4306            |
| <i>Salmonella</i> Typhimurium D23580 <i>melB</i> <sup>+</sup> (contains the two 4/74 <i>melB</i> SNPs)                                                         | This study | JH4307            |
| <i>Salmonella</i> Typhimurium D23580 <i>melR</i> <sup>+</sup> (contains the 4/74 <i>melR</i> SNP)                                                              | This study | JH4308            |
| <i>Salmonella</i> Typhimurium D23580 <i>melB</i> <sup>+</sup> <i>melR</i> <sup>+</sup> (contains the two 4/74 <i>melB</i> SNPs and the 4/74 <i>melR</i> SNP)   | This study | JH4309            |
| <i>Salmonella</i> Typhimurium D23580 $\Delta$ <i>cysS</i> <sup>chr::frit</sup>                                                                                 | This study | JH4298            |
| <i>Salmonella</i> Typhimurium D23580 $\Delta$ <i>cysS</i> <sup>pBT1::frit</sup>                                                                                | This study | JH4299            |
| <i>Salmonella</i> Typhimurium D23580 $\Delta$ pBT1                                                                                                             | This study | JH4300            |
| <i>E. coli</i> S17-1 $\lambda$ <i>pir</i> ( <i>pro thi hsdR recA</i> chromosome::RP4-2 Tc::Mu Km::Tn7/ <i>λpir</i> ; Tp <sup>R</sup> , Sm <sup>R</sup> )       | [5]        | JH3867            |
| <b>Plasmids</b>                                                                                                                                                |            |                   |
| <i>frit-aph-frit</i> cassette template plasmid; Km <sup>R</sup>                                                                                                | [6]        | pKD4              |
| $\lambda$ Red recombination plasmid, temperature-inducible; Tc <sup>R</sup>                                                                                    | [7]        | pSIM5- <i>tet</i> |
| FLP recombinase expression plasmid; Tc <sup>R</sup>                                                                                                            | [8]        | pCP20-TcR         |
| pKD4 derivative with an I-SceI site cloned upstream of <i>aph</i> ; Km <sup>R</sup>                                                                            | [9]        | pKD4-I-SceI       |
| Plasmid for <i>m</i> -toluate-inducible expression of the I-SceI enzyme; Gm <sup>R</sup>                                                                       | [10]       | pSW-2             |
| Suicide plasmid; Km <sup>R</sup>                                                                                                                               | [10]       | pEMG              |

## Supporting References

- Rankin JD, Taylor RJ. The estimation of doses of *Salmonella typhimurium* suitable for the experimental production of disease in calves. *Vet Rec.* 1966;78: 706–707.
- Kingsley RA, Msefula CL, Thomson NR, Kariuki S, Holt KE, Gordon MA, et al. Epidemic multiple drug resistant *Salmonella Typhimurium* causing invasive disease in sub-Saharan Africa have a distinct genotype. *Genome Res.* 2009;19: 2279–2287. doi:10.1101/gr.091017.109
- Ashton PM, Owen SV, Kaindama L, Rowe WPM, Lane CR, Larkin L, et al. Public health surveillance in the UK revolutionises our understanding of the invasive *Salmonella Typhimurium* epidemic in Africa. *Genome Med.* 2017;9. doi:10.1186/s13073-017-0480-7
- Msefula CL, Kingsley RA, Gordon MA, Molyneux E, Molyneux ME, MacLennan CA, et al. Genotypic Homogeneity of Multidrug Resistant *S. Typhimurium* Infecting Distinct Adult and Childhood Susceptibility Groups in Blantyre, Malawi. *PLOS ONE.* 2012;7: e42085. doi:10.1371/journal.pone.0042085

5. Simon R, Prierer U, Pühler A. A Broad Host Range Mobilization System for In Vivo Genetic Engineering: Transposon Mutagenesis in Gram Negative Bacteria. *Nat Biotechnol.* 1983;1: 784–791. doi:10.1038/nbt1183-784
6. Datsenko KA, Wanner BL. One-step inactivation of chromosomal genes in *Escherichia coli* K-12 using PCR products. *Proc Natl Acad Sci U S A.* 2000;97: 6640–6645.
7. Koskiniemi S, Pránting M, Gullberg E, Näsvall J, Andersson DI. Activation of cryptic aminoglycoside resistance in *Salmonella enterica*. *Mol Microbiol.* 2011;80: 1464–1478. doi:10.1111/j.1365-2958.2011.07657.x
8. Kintz E, Davies MR, Hammarlöf DL, Canals R, Hinton JCD, van der Woude MW. A BTP1 prophage gene present in invasive non-typhoidal *Salmonella* determines composition and length of the O-antigen of the lipopolysaccharide. *Mol Microbiol.* 2015;96: 263–275. doi:10.1111/mmi.12933
9. Owen SV, Wenner N, Canals R, Makumi A, Hammarlöf DL, Gordon MA, et al. Characterization of the Prophage Repertoire of African *Salmonella* Typhimurium ST313 Reveals High Levels of Spontaneous Induction of Novel Phage BTP1. *Front Microbiol.* 2017;8. doi:10.3389/fmicb.2017.00235
10. Martínez-García E, Lorenzo V de. Engineering multiple genomic deletions in Gram-negative bacteria: analysis of the multi-resistant antibiotic profile of *Pseudomonas putida* KT2440. *Environ Microbiol.* 2011;13: 2702–2716. doi:10.1111/j.1462-2920.2011.02538.x
