# Supplementary material for: Adding function to the genome of African Salmonella Typhimurium ST313 strain D23580
Source: PubMed Central journal article supplement (PMC6333337; doi:10.1371/journal.pbio.3000059), 2019-01-15
Supplement: pbio.3000059.s010.pdf [file pbio.3000059.s010.pdf]

| Condition                      | Description <sup>a</sup>                                                                                                                                                                                                                             |
|--------------------------------|------------------------------------------------------------------------------------------------------------------------------------------------------------------------------------------------------------------------------------------------------|
| EEP (early exponential phase)  | Growth in Lennox broth at 37°C, 220 rpm (in a water bath), to OD <sub>600 nm</sub> 0.1.                                                                                                                                                              |
| MEP (middle exponential phase) | Growth in Lennox broth at 37°C, 220 rpm (in a water bath), to OD <sub>600 nm</sub> 0.3.                                                                                                                                                              |
| LEP (late exponential phase)   | Growth in Lennox broth at 37°C, 220 rpm (in a water bath), to OD <sub>600 nm</sub> 1.                                                                                                                                                                |
| ESP (early stationary phase)   | Growth in Lennox broth at 37°C, 220 rpm (in a water bath), to OD <sub>600 nm</sub> 2.                                                                                                                                                                |
| LSP (late stationary phase)    | Growth in Lennox broth at 37°C, 220 rpm (in a water bath), to OD <sub>600 nm</sub> 2, followed by a further 6 h growth in the same incubation conditions.                                                                                            |
| 25°C                           | Growth in Lennox broth at 25°C, 220 rpm (in a water bath), to OD <sub>600 nm</sub> 0.3.                                                                                                                                                              |
| NaCl shock                     | Growth in Lennox broth at 37°C, 220 rpm (in a water bath), to OD <sub>600 nm</sub> 0.3, then addition of NaCl to a final concentration of 0.3 M for 10 min in the same incubation conditions.                                                        |
| Bile shock                     | Growth in Lennox broth at 37°C, 220 rpm (in a water bath), to OD <sub>600 nm</sub> 0.3, then addition of bile to a final concentration of 3% for 10 min in the same incubation conditions.                                                           |
| Low Fe <sup>2+</sup> shock     | Growth in Lennox broth at 37°C, 220 rpm (in a water bath), to OD <sub>600 nm</sub> 0.3, then addition of 2,2'-dipyridyl to a final concentration of 0.2 mM for 10 min in the same incubation conditions.                                             |
| Anaerobic shock                | Growth in Lennox broth at 37°C, 220 rpm (in a water bath), to OD <sub>600 nm</sub> 0.3, then transfer of 15 ml into a 15 ml Falcon tube and incubated statically at 37°C for 30 min.                                                                 |
| Anaerobic growth               | Growth in Lennox broth in a completely filled and closed 50 ml Falcon tube, incubated statically at 37°C, to OD <sub>600 nm</sub> 0.3.                                                                                                               |
| Oxygen shock                   | Growth in Lennox broth in a completely filled and closed 50 ml Falcon tube, incubated statically at 37°C, to OD <sub>600 nm</sub> 0.3, then transfer into a baffled flask for 15 min at 37°C, 250 rpm (in a water bath).                             |
| NonSPI2 (SPI-2-noninducing)    | Growth in PCN medium (pH 7.4, 25 mM P <sub>i</sub> ) at 37°C, 220 rpm (in a water bath), to OD <sub>600 nm</sub> 0.3.                                                                                                                                |
| InSPI2 (SPI-2-inducing)        | Growth in PCN medium (pH 5.8, 0.4 mM P <sub>i</sub> ) at 37°C, 220 rpm (in a water bath), to OD <sub>600 nm</sub> 0.3.                                                                                                                               |
| Peroxide shock (InSPI2)        | Growth in PCN medium (pH 5.8, 0.4 mM P <sub>i</sub> ) at 37°C, 220 rpm (in a water bath), to OD <sub>600 nm</sub> 0.3, then addition of H <sub>2</sub> O <sub>2</sub> to a final concentration of 1 mM for 12 min in the same incubation conditions. |
| Nitric oxide shock (InSPI2)    | Growth in PCN medium (pH 5.8, 0.4 mM P <sub>i</sub> ) at 37°C, 220 rpm (in a water bath), to OD <sub>600 nm</sub> 0.3, then addition of spermine NONOate to a final concentration of 250 μM for 20 min in the same incubation conditions.            |
| Macrophage                     | Bacteria from the intra-macrophage (RAW264.7) environment were recovered after 8 h post-infection <sup>b</sup> .                                                                                                                                     |

<sup>a</sup> Precise details of the growth conditions, including the components of the phosphate carbon nitrogen (PCN)-related minimal media and the type of water bath that was used, have been published previously in Kröger and colleagues [1].

<sup>b</sup> A detailed protocol for this condition was described in Srikumar and colleagues [2].

## Supporting References

1. Kröger C, Colgan A, Srikumar S, Händler K, Sivasankaran SK, Hammarlöf DL, et al. An Infection-Relevant Transcriptomic Compendium for *Salmonella enterica* Serovar Typhimurium. *Cell Host Microbe*. 2013;14: 683–695. doi:10.1016/j.chom.2013.11.010
2. Srikumar S, Kröger C, Hébrard M, Colgan A, Owen SV, Sivasankaran SK, et al. RNA-seq Brings New Insights to the Intra-Macrophage Transcriptome of *Salmonella* Typhimurium. *PLOS Pathog*. 2015;11: e1005262. doi:10.1371/journal.ppat.1005262
