# Supplementary material for: Adding function to the genome of African Salmonella Typhimurium ST313 strain D23580
Source: PLoS Biol. 2019 Jan 15;17(1):e3000059. doi: 10.1371/journal.pbio.3000059 (PMC6333337; doi:10.1371/journal.pbio.3000059)
Supplement: S1 Data — (XLSX) [file pbio.3000059.s021.xlsx]

## Sheet: Content S1 Data
S1 Data tabs	Contents
a. Raw data Fig 7E	Data represent OD600 nm of bacteria growing in M9 supplemented with 0.4% melibiose at 8 h time.
b. Raw data Fig 8B	Data represent the location of the transposon insertion sites for the cysSchr and cysSpBT1 gene regions.
c. Raw data for Fig 9A	Data represent OD600 nm of bacteria growing in LB.
d. Raw data for Fig 9B	Data represent OD600 nm of bacteria growing in M9 supplemented with 0.4% glucose.
e. Raw data for Fig 9C	Data represent TPM values.
f. Raw data S5 Fig B	Data represent diameter of migration in cm on swimming plates (S1 Text).
g. Raw data S5 Fig C	Data represent percentage of cell death (S1 Text).

## Sheet: a. Raw data Fig 7E
Biological replicate	M9 melibiose (control)	4/74	4/74 melB-	4/74 melR-	4/74 melB-melR-	D23580	D23580 melB+	D23580 melR+	D23580 melB+melR+
1	0.109	0.529	0.534	0.124	0.117	0.121	0.137	0.457	0.491
2	0.111	0.51	0.532	0.124	0.131	0.127	0.121	0.432	0.488
3	0.097	0.51	0.533	0.119	0.121	0.122	0.133	0.429	0.465
4	0.1	0.532	0.517	0.123	0.13	0.124	0.131	0.422	0.48
5	0.103	0.526	0.512	0.126	0.13	0.13	0.15	0.452	0.479
6	0.106	0.529	0.509	0.128	0.132	0.128	0.129	0.466	0.507
7	0.11	0.53	0.531	0.119	0.125	0.122	0.13	0.474	0.503
Average	0.105143	0.523714	0.524	0.123286	0.126571	0.124857	0.133	0.447429	0.487571
Standard deviation	0.00533631	0.0095344	0.0108934	0.00335233	0.00574042	0.00348466	0.00892562	0.0199487	0.0145357
[(Average) - (Average control)]	0	0.418614	0.4189	0.0181857	0.0214714	0.0197571	0.0279	0.342329	0.382471
Tukey's multiple comparisons test	Mean Diff.	95.00% CI of diff.	Significant?	Summary	Adjusted p-value
4/74 vs. 4/74 melB-	-0.0008	-0.01926 to 0.01766	No	ns	>0.9999
4/74 vs. 4/74 melR-	0.3991	0.3806 to 0.4176	Yes	****	<0.0001
4/74 vs. 4/74 melB-melR-	0.3966	0.3781 to 0.4151	Yes	****	<0.0001
4/74 vs. D23580	0.3983	0.3798 to 0.4168	Yes	****	<0.0001
4/74 vs. D23580 melB+	0.3902	0.3717 to 0.4087	Yes	****	<0.0001
4/74 vs. D23580 melR+	0.0758	0.05734 to 0.09426	Yes	****	<0.0001
4/74 vs. D23580 melB+melR+	0.0356	0.01714 to 0.05406	Yes	****	<0.0001
4/74 melB- vs. 4/74 melR-	0.3999	0.3814 to 0.4184	Yes	****	<0.0001
4/74 melB- vs. 4/74 melB-melR-	0.3974	0.3789 to 0.4159	Yes	****	<0.0001
4/74 melB- vs. D23580	0.3991	0.3806 to 0.4176	Yes	****	<0.0001
4/74 melB- vs. D23580 melB+	0.391	0.3725 to 0.4095	Yes	****	<0.0001
4/74 melB- vs. D23580 melR+	0.0766	0.05814 to 0.09506	Yes	****	<0.0001
4/74 melB- vs. D23580 melB+melR+	0.0364	0.01794 to 0.05486	Yes	****	<0.0001
4/74 melR- vs. 4/74 melB-melR-	-0.0025	-0.02096 to 0.01596	No	ns	0.9999
4/74 melR- vs. D23580	-0.0008	-0.01926 to 0.01766	No	ns	>0.9999
4/74 melR- vs. D23580 melB+	-0.0089	-0.02736 to 0.009563	No	ns	0.789
4/74 melR- vs. D23580 melR+	-0.3233	-0.3418 to -0.3048	Yes	****	<0.0001
4/74 melR- vs. D23580 melB+melR+	-0.3635	-0.382 to -0.345	Yes	****	<0.0001
4/74 melB-melR- vs. D23580	0.0017	-0.01676 to 0.02016	No	ns	>0.9999
4/74 melB-melR- vs. D23580 melB+	-0.0064	-0.02486 to 0.01206	No	ns	0.9541
4/74 melB-melR- vs. D23580 melR+	-0.3208	-0.3393 to -0.3023	Yes	****	<0.0001
4/74 melB-melR- vs. D23580 melB+melR+	-0.361	-0.3795 to -0.3425	Yes	****	<0.0001
D23580 vs. D23580 melB+	-0.0081	-0.02656 to 0.01036	No	ns	0.8573
D23580 vs. D23580 melR+	-0.3225	-0.341 to -0.304	Yes	****	<0.0001
D23580 vs. D23580 melB+melR+	-0.3627	-0.3812 to -0.3442	Yes	****	<0.0001
D23580 melB+ vs. D23580 melR+	-0.3144	-0.3329 to -0.2959	Yes	****	<0.0001
D23580 melB+ vs. D23580 melB+melR+	-0.3546	-0.3731 to -0.3361	Yes	****	<0.0001
D23580 melR+ vs. D23580 melB+melR+	-0.0402	-0.05866 to -0.02174	Yes	****	<0.0001

## Sheet: b. Raw data Fig 8B
D23580 ID	Gene name	Replicon	Insertion position	Insertion orientation	Reads	Product
STMMW_06051	cysS	Chromosome	637997	+	2	cysteinyl-tRNA synthetase
STMMW_06051	cysS	Chromosome	638001	+	7	cysteinyl-tRNA synthetase
STMMW_06051	cysS	Chromosome	638002	+	3	cysteinyl-tRNA synthetase
STMMW_06051	cysS	Chromosome	638009	-	1	cysteinyl-tRNA synthetase
STMMW_06051	cysS	Chromosome	638010	-	3	cysteinyl-tRNA synthetase
STMMW_06051	cysS	Chromosome	638012	+	3	cysteinyl-tRNA synthetase
STMMW_06051	cysS	Chromosome	638016	+	10	cysteinyl-tRNA synthetase
STMMW_06051	cysS	Chromosome	638020	+	11	cysteinyl-tRNA synthetase
STMMW_06051	cysS	Chromosome	638020	-	6	cysteinyl-tRNA synthetase
STMMW_06051	cysS	Chromosome	638024	+	1	cysteinyl-tRNA synthetase
STMMW_06051	cysS	Chromosome	638024	-	16	cysteinyl-tRNA synthetase
STMMW_06051	cysS	Chromosome	638026	+	3	cysteinyl-tRNA synthetase
STMMW_06051	cysS	Chromosome	638028	-	5	cysteinyl-tRNA synthetase
STMMW_06051	cysS	Chromosome	638031	+	2	cysteinyl-tRNA synthetase
STMMW_06051	cysS	Chromosome	638032	-	2	cysteinyl-tRNA synthetase
STMMW_06051	cysS	Chromosome	638034	-	14	cysteinyl-tRNA synthetase
STMMW_06051	cysS	Chromosome	638037	+	4	cysteinyl-tRNA synthetase
STMMW_06051	cysS	Chromosome	638037	-	1	cysteinyl-tRNA synthetase
STMMW_06051	cysS	Chromosome	638039	-	6	cysteinyl-tRNA synthetase
STMMW_06051	cysS	Chromosome	638044	+	1	cysteinyl-tRNA synthetase
STMMW_06051	cysS	Chromosome	638045	+	11	cysteinyl-tRNA synthetase
STMMW_06051	cysS	Chromosome	638048	+	2	cysteinyl-tRNA synthetase
STMMW_06051	cysS	Chromosome	638053	-	5	cysteinyl-tRNA synthetase
STMMW_06051	cysS	Chromosome	638057	+	6	cysteinyl-tRNA synthetase
STMMW_06051	cysS	Chromosome	638058	-	1	cysteinyl-tRNA synthetase
STMMW_06051	cysS	Chromosome	638060	+	14	cysteinyl-tRNA synthetase
STMMW_06051	cysS	Chromosome	638061	+	1	cysteinyl-tRNA synthetase
STMMW_06051	cysS	Chromosome	638067	+	8	cysteinyl-tRNA synthetase
STMMW_06051	cysS	Chromosome	638068	-	7	cysteinyl-tRNA synthetase
STMMW_06051	cysS	Chromosome	638071	+	1	cysteinyl-tRNA synthetase
STMMW_06051	cysS	Chromosome	638083	-	2	cysteinyl-tRNA synthetase
STMMW_06051	cysS	Chromosome	638090	-	2	cysteinyl-tRNA synthetase
STMMW_06051	cysS	Chromosome	638116	-	9	cysteinyl-tRNA synthetase
STMMW_06051	cysS	Chromosome	638118	+	6	cysteinyl-tRNA synthetase
STMMW_06051	cysS	Chromosome	638124	+	1	cysteinyl-tRNA synthetase
STMMW_06051	cysS	Chromosome	638125	+	4	cysteinyl-tRNA synthetase
STMMW_06051	cysS	Chromosome	638131	-	1	cysteinyl-tRNA synthetase
STMMW_06051	cysS	Chromosome	638137	+	1	cysteinyl-tRNA synthetase
STMMW_06051	cysS	Chromosome	638145	-	1	cysteinyl-tRNA synthetase
STMMW_06051	cysS	Chromosome	638146	-	3	cysteinyl-tRNA synthetase
STMMW_06051	cysS	Chromosome	638147	-	1	cysteinyl-tRNA synthetase
STMMW_06051	cysS	Chromosome	638166	+	1	cysteinyl-tRNA synthetase
STMMW_06051	cysS	Chromosome	638174	-	2	cysteinyl-tRNA synthetase
STMMW_06051	cysS	Chromosome	638232	+	1	cysteinyl-tRNA synthetase
STMMW_06051	cysS	Chromosome	638236	-	1	cysteinyl-tRNA synthetase
STMMW_06051	cysS	Chromosome	638240	-	1	cysteinyl-tRNA synthetase
STMMW_06051	cysS	Chromosome	638241	+	1	cysteinyl-tRNA synthetase
STMMW_06051	cysS	Chromosome	638249	-	6	cysteinyl-tRNA synthetase
STMMW_06051	cysS	Chromosome	638250	+	1	cysteinyl-tRNA synthetase
STMMW_06051	cysS	Chromosome	638251	+	3	cysteinyl-tRNA synthetase
STMMW_06051	cysS	Chromosome	638259	+	3	cysteinyl-tRNA synthetase
STMMW_06051	cysS	Chromosome	638259	-	2	cysteinyl-tRNA synthetase
STMMW_06051	cysS	Chromosome	638278	+	2	cysteinyl-tRNA synthetase
STMMW_06051	cysS	Chromosome	638281	+	3	cysteinyl-tRNA synthetase
STMMW_06051	cysS	Chromosome	638285	-	1	cysteinyl-tRNA synthetase
STMMW_06051	cysS	Chromosome	638286	-	3	cysteinyl-tRNA synthetase
STMMW_06051	cysS	Chromosome	638289	-	2	cysteinyl-tRNA synthetase
STMMW_06051	cysS	Chromosome	638290	+	6	cysteinyl-tRNA synthetase
STMMW_06051	cysS	Chromosome	638291	+	1	cysteinyl-tRNA synthetase
STMMW_06051	cysS	Chromosome	638299	-	1	cysteinyl-tRNA synthetase
STMMW_06051	cysS	Chromosome	638300	-	25	cysteinyl-tRNA synthetase
STMMW_06051	cysS	Chromosome	638318	+	5	cysteinyl-tRNA synthetase
STMMW_06051	cysS	Chromosome	638319	+	4	cysteinyl-tRNA synthetase
STMMW_06051	cysS	Chromosome	638327	-	2	cysteinyl-tRNA synthetase
STMMW_06051	cysS	Chromosome	638335	-	1	cysteinyl-tRNA synthetase
STMMW_06051	cysS	Chromosome	638339	+	5	cysteinyl-tRNA synthetase
STMMW_06051	cysS	Chromosome	638344	+	1	cysteinyl-tRNA synthetase
STMMW_06051	cysS	Chromosome	638346	+	6	cysteinyl-tRNA synthetase
STMMW_06051	cysS	Chromosome	638347	-	12	cysteinyl-tRNA synthetase
STMMW_06051	cysS	Chromosome	638349	+	1	cysteinyl-tRNA synthetase
STMMW_06051	cysS	Chromosome	638352	+	1	cysteinyl-tRNA synthetase
STMMW_06051	cysS	Chromosome	638352	-	9	cysteinyl-tRNA synthetase
STMMW_06051	cysS	Chromosome	638354	-	2	cysteinyl-tRNA synthetase
STMMW_06051	cysS	Chromosome	638356	+	15	cysteinyl-tRNA synthetase
STMMW_06051	cysS	Chromosome	638357	-	1	cysteinyl-tRNA synthetase
STMMW_06051	cysS	Chromosome	638361	+	1	cysteinyl-tRNA synthetase
STMMW_06051	cysS	Chromosome	638364	-	5	cysteinyl-tRNA synthetase
STMMW_06051	cysS	Chromosome	638369	-	1	cysteinyl-tRNA synthetase
STMMW_06051	cysS	Chromosome	638372	+	3	cysteinyl-tRNA synthetase
STMMW_06051	cysS	Chromosome	638380	-	2	cysteinyl-tRNA synthetase
STMMW_06051	cysS	Chromosome	638394	-	1	cysteinyl-tRNA synthetase
STMMW_06051	cysS	Chromosome	638395	+	1	cysteinyl-tRNA synthetase
STMMW_06051	cysS	Chromosome	638407	+	1	cysteinyl-tRNA synthetase
STMMW_06051	cysS	Chromosome	638408	+	1	cysteinyl-tRNA synthetase
STMMW_06051	cysS	Chromosome	638415	-	21	cysteinyl-tRNA synthetase
STMMW_06051	cysS	Chromosome	638431	+	1	cysteinyl-tRNA synthetase
STMMW_06051	cysS	Chromosome	638438	-	2	cysteinyl-tRNA synthetase
STMMW_06051	cysS	Chromosome	638453	-	2	cysteinyl-tRNA synthetase
STMMW_06051	cysS	Chromosome	638454	-	1	cysteinyl-tRNA synthetase
STMMW_06051	cysS	Chromosome	638455	-	6	cysteinyl-tRNA synthetase
STMMW_06051	cysS	Chromosome	638461	-	10	cysteinyl-tRNA synthetase
STMMW_06051	cysS	Chromosome	638462	+	1	cysteinyl-tRNA synthetase
STMMW_06051	cysS	Chromosome	638470	-	3	cysteinyl-tRNA synthetase
STMMW_06051	cysS	Chromosome	638488	-	1	cysteinyl-tRNA synthetase
STMMW_06051	cysS	Chromosome	638502	+	4	cysteinyl-tRNA synthetase
STMMW_06051	cysS	Chromosome	638534	+	8	cysteinyl-tRNA synthetase
STMMW_06051	cysS	Chromosome	638536	+	1	cysteinyl-tRNA synthetase
STMMW_06051	cysS	Chromosome	638541	-	1	cysteinyl-tRNA synthetase
STMMW_06051	cysS	Chromosome	638542	-	14	cysteinyl-tRNA synthetase
STMMW_06051	cysS	Chromosome	638543	-	1	cysteinyl-tRNA synthetase
STMMW_06051	cysS	Chromosome	638544	-	5	cysteinyl-tRNA synthetase
STMMW_06051	cysS	Chromosome	638598	-	1	cysteinyl-tRNA synthetase
STMMW_06051	cysS	Chromosome	638601	-	1	cysteinyl-tRNA synthetase
STMMW_06051	cysS	Chromosome	638602	-	7	cysteinyl-tRNA synthetase
STMMW_06051	cysS	Chromosome	638612	+	5	cysteinyl-tRNA synthetase
STMMW_06051	cysS	Chromosome	638625	+	1	cysteinyl-tRNA synthetase
STMMW_06051	cysS	Chromosome	638633	-	1	cysteinyl-tRNA synthetase
STMMW_06051	cysS	Chromosome	638639	+	3	cysteinyl-tRNA synthetase
STMMW_06051	cysS	Chromosome	638647	+	7	cysteinyl-tRNA synthetase
STMMW_06051	cysS	Chromosome	638647	-	14	cysteinyl-tRNA synthetase
STMMW_06051	cysS	Chromosome	638648	-	1	cysteinyl-tRNA synthetase
STMMW_06051	cysS	Chromosome	638663	+	13	cysteinyl-tRNA synthetase
STMMW_06051	cysS	Chromosome	638668	+	18	cysteinyl-tRNA synthetase
STMMW_06051	cysS	Chromosome	638671	-	4	cysteinyl-tRNA synthetase
STMMW_06051	cysS	Chromosome	638673	-	1	cysteinyl-tRNA synthetase
STMMW_06051	cysS	Chromosome	638676	-	14	cysteinyl-tRNA synthetase
STMMW_06051	cysS	Chromosome	638687	+	3	cysteinyl-tRNA synthetase
STMMW_06051	cysS	Chromosome	638693	+	1	cysteinyl-tRNA synthetase
STMMW_06051	cysS	Chromosome	638695	-	3	cysteinyl-tRNA synthetase
STMMW_06051	cysS	Chromosome	638701	+	4	cysteinyl-tRNA synthetase
STMMW_06051	cysS	Chromosome	638707	+	1	cysteinyl-tRNA synthetase
STMMW_06051	cysS	Chromosome	638709	-	1	cysteinyl-tRNA synthetase
STMMW_06051	cysS	Chromosome	638711	-	1	cysteinyl-tRNA synthetase
STMMW_06051	cysS	Chromosome	638713	+	11	cysteinyl-tRNA synthetase
STMMW_06051	cysS	Chromosome	638717	+	2	cysteinyl-tRNA synthetase
STMMW_06051	cysS	Chromosome	638721	-	2	cysteinyl-tRNA synthetase
STMMW_06051	cysS	Chromosome	638753	-	1	cysteinyl-tRNA synthetase
STMMW_06051	cysS	Chromosome	638764	+	4	cysteinyl-tRNA synthetase
STMMW_06051	cysS	Chromosome	638766	+	3	cysteinyl-tRNA synthetase
STMMW_06051	cysS	Chromosome	638772	-	9	cysteinyl-tRNA synthetase
STMMW_06051	cysS	Chromosome	638774	-	7	cysteinyl-tRNA synthetase
STMMW_06051	cysS	Chromosome	638788	+	4	cysteinyl-tRNA synthetase
STMMW_06051	cysS	Chromosome	638818	+	1	cysteinyl-tRNA synthetase
STMMW_06051	cysS	Chromosome	638826	+	1	cysteinyl-tRNA synthetase
STMMW_06051	cysS	Chromosome	638826	-	4	cysteinyl-tRNA synthetase
STMMW_06051	cysS	Chromosome	638834	-	1	cysteinyl-tRNA synthetase
STMMW_06051	cysS	Chromosome	638835	-	3	cysteinyl-tRNA synthetase
STMMW_06051	cysS	Chromosome	638843	+	1	cysteinyl-tRNA synthetase
STMMW_06051	cysS	Chromosome	638849	+	14	cysteinyl-tRNA synthetase
STMMW_06051	cysS	Chromosome	638856	+	2	cysteinyl-tRNA synthetase
STMMW_06051	cysS	Chromosome	638857	-	14	cysteinyl-tRNA synthetase
STMMW_06051	cysS	Chromosome	638890	-	1	cysteinyl-tRNA synthetase
STMMW_06051	cysS	Chromosome	638897	+	7	cysteinyl-tRNA synthetase
STMMW_06051	cysS	Chromosome	638899	+	18	cysteinyl-tRNA synthetase
STMMW_06051	cysS	Chromosome	638902	+	4	cysteinyl-tRNA synthetase
STMMW_06051	cysS	Chromosome	638904	+	5	cysteinyl-tRNA synthetase
STMMW_06051	cysS	Chromosome	638905	-	8	cysteinyl-tRNA synthetase
STMMW_06051	cysS	Chromosome	638907	-	18	cysteinyl-tRNA synthetase
STMMW_06051	cysS	Chromosome	638910	-	5	cysteinyl-tRNA synthetase
STMMW_06051	cysS	Chromosome	638912	-	2	cysteinyl-tRNA synthetase
STMMW_06051	cysS	Chromosome	638914	+	4	cysteinyl-tRNA synthetase
STMMW_06051	cysS	Chromosome	638922	-	2	cysteinyl-tRNA synthetase
STMMW_06051	cysS	Chromosome	638923	+	7	cysteinyl-tRNA synthetase
STMMW_06051	cysS	Chromosome	638936	+	11	cysteinyl-tRNA synthetase
STMMW_06051	cysS	Chromosome	638955	+	6	cysteinyl-tRNA synthetase
STMMW_06051	cysS	Chromosome	638990	+	1	cysteinyl-tRNA synthetase
STMMW_06051	cysS	Chromosome	638998	-	1	cysteinyl-tRNA synthetase
STMMW_06051	cysS	Chromosome	639000	+	4	cysteinyl-tRNA synthetase
STMMW_06051	cysS	Chromosome	639000	-	1	cysteinyl-tRNA synthetase
STMMW_06051	cysS	Chromosome	639007	+	5	cysteinyl-tRNA synthetase
STMMW_06051	cysS	Chromosome	639008	-	13	cysteinyl-tRNA synthetase
STMMW_06051	cysS	Chromosome	639015	-	3	cysteinyl-tRNA synthetase
STMMW_06051	cysS	Chromosome	639022	+	5	cysteinyl-tRNA synthetase
STMMW_06051	cysS	Chromosome	639030	-	1	cysteinyl-tRNA synthetase
STMMW_06051	cysS	Chromosome	639061	+	5	cysteinyl-tRNA synthetase
STMMW_06051	cysS	Chromosome	639070	-	2	cysteinyl-tRNA synthetase
STMMW_06051	cysS	Chromosome	639081	+	1	cysteinyl-tRNA synthetase
STMMW_06051	cysS	Chromosome	639090	-	9	cysteinyl-tRNA synthetase
STMMW_06051	cysS	Chromosome	639095	-	2	cysteinyl-tRNA synthetase
STMMW_06051	cysS	Chromosome	639114	+	1	cysteinyl-tRNA synthetase
STMMW_06051	cysS	Chromosome	639122	-	5	cysteinyl-tRNA synthetase
STMMW_06051	cysS	Chromosome	639124	+	2	cysteinyl-tRNA synthetase
STMMW_06051	cysS	Chromosome	639125	+	1	cysteinyl-tRNA synthetase
STMMW_06051	cysS	Chromosome	639132	-	9	cysteinyl-tRNA synthetase
STMMW_06051	cysS	Chromosome	639133	-	1	cysteinyl-tRNA synthetase
STMMW_06051	cysS	Chromosome	639143	+	1	cysteinyl-tRNA synthetase
STMMW_06051	cysS	Chromosome	639149	+	2	cysteinyl-tRNA synthetase
STMMW_06051	cysS	Chromosome	639203	+	1	cysteinyl-tRNA synthetase
STMMW_06051	cysS	Chromosome	639211	-	5	cysteinyl-tRNA synthetase
STMMW_06051	cysS	Chromosome	639212	+	3	cysteinyl-tRNA synthetase
STMMW_06051	cysS	Chromosome	639218	-	1	cysteinyl-tRNA synthetase
STMMW_06051	cysS	Chromosome	639219	-	4	cysteinyl-tRNA synthetase
STMMW_06051	cysS	Chromosome	639230	+	5	cysteinyl-tRNA synthetase
STMMW_06051	cysS	Chromosome	639257	+	4	cysteinyl-tRNA synthetase
STMMW_06051	cysS	Chromosome	639265	-	1	cysteinyl-tRNA synthetase
STMMW_06051	cysS	Chromosome	639280	+	1	cysteinyl-tRNA synthetase
STMMW_06051	cysS	Chromosome	639287	+	1	cysteinyl-tRNA synthetase
STMMW_06051	cysS	Chromosome	639288	-	3	cysteinyl-tRNA synthetase
STMMW_06051	cysS	Chromosome	639295	-	8	cysteinyl-tRNA synthetase
STMMW_06051	cysS	Chromosome	639300	+	1	cysteinyl-tRNA synthetase
STMMW_06051	cysS	Chromosome	639310	-	3	cysteinyl-tRNA synthetase
pBT1-0241	cysSpBT1	Plasmid pBT1	17864	+	1	Cysteinyl-tRNA synthetase
pBT1-0241	cysSpBT1	Plasmid pBT1	18192	+	1	Cysteinyl-tRNA synthetase
pBT1-0241	cysSpBT1	Plasmid pBT1	18232	-	1	Cysteinyl-tRNA synthetase
pBT1-0241	cysSpBT1	Plasmid pBT1	18299	-	1	Cysteinyl-tRNA synthetase
pBT1-0241	cysSpBT1	Plasmid pBT1	18468	-	1	Cysteinyl-tRNA synthetase
pBT1-0241	cysSpBT1	Plasmid pBT1	18611	-	1	Cysteinyl-tRNA synthetase
pBT1-0241	cysSpBT1	Plasmid pBT1	18635	+	1	Cysteinyl-tRNA synthetase
pBT1-0241	cysSpBT1	Plasmid pBT1	18679	-	1	Cysteinyl-tRNA synthetase
pBT1-0241	cysSpBT1	Plasmid pBT1	18795	+	1	Cysteinyl-tRNA synthetase
pBT1-0241	cysSpBT1	Plasmid pBT1	18980	+	2	Cysteinyl-tRNA synthetase
pBT1-0241	cysSpBT1	Plasmid pBT1	19030	+	1	Cysteinyl-tRNA synthetase
pBT1-0241	cysSpBT1	Plasmid pBT1	19189	+	1	Cysteinyl-tRNA synthetase
pBT1-0241	cysSpBT1	Plasmid pBT1	19198	+	7	Cysteinyl-tRNA synthetase

## Sheet: c. Raw data Fig 9A
Time	LB (control)								D23580										D23580 ΔcysSchr::frt										D23580 ΔcysSpBT1::frt										D23580 ΔpBT1
	1	2	3	4	5	6	6	Average	1	2	3	4	5	6	7	8	[(Average) - (Average control)]	Standard deviation	1	2	3	4	5	6	7	8	[(Average) - (Average control)]	Standard deviation	1	2	3	4	5	6	7	8	[(Average) - (Average control)]	Standard deviation	1	2	3	4	5	6	7	8	[(Average) - (Average control)]	Standard deviation
0 h	0.133	0.123	0.125	0.113	0.112	0.12	0.121	0.121	0.129	0.127	0.131	0.126	0.125	0.124	0.122	0.124	0.005	0.0029277	0.131	0.128	0.122	0.131	0.126	0.123	0.137	0.132	0.00775	0.00500714	0.129	0.122	0.13	0.122	0.118	0.119	0.118	0.118	0.001	0.00492805	0.131	0.119	0.133	0.125	0.119	0.119	0.139	0.115	0.004	0.00848528
1 h	0.132	0.121	0.124	0.115	0.123	0.115	0.121	0.121571	0.157	0.148	0.152	0.155	0.168	0.161	0.152	0.161	0.0351786	0.0064087	0.146	0.155	0.136	0.133	0.14	0.14	0.14	0.141	0.0198036	0.00667485	0.138	0.132	0.134	0.133	0.131	0.129	0.133	0.128	0.0106786	0.0031053	0.153	0.136	0.15	0.132	0.144	0.138	0.136	0.139	0.0194286	0.00734847
2 h	0.134	0.122	0.124	0.118	0.121	0.117	0.125	0.123	0.32	0.345	0.318	0.335	0.392	0.475	0.428	0.376	0.250625	0.0558798	0.23	0.219	0.23	0.264	0.244	0.315	0.231	0.238	0.123375	0.0307475	0.152	0.141	0.147	0.151	0.145	0.143	0.147	0.141	0.022875	0.0041897	0.265	0.234	0.348	0.255	0.266	0.269	0.267	0.291	0.151375	0.0336874
3 h	0.133	0.126	0.128	0.123	0.121	0.119	0.127	0.125286	0.77	0.799	1.096	1.063	0.946	1.122	0.917	0.891	0.825214	0.132802	0.61	0.608	0.73	0.836	0.739	0.865	0.668	0.666	0.589964	0.0963813	0.199	0.184	0.186	0.214	0.213	0.197	0.208	0.205	0.0754643	0.0114111	0.696	0.656	0.867	0.691	0.853	0.778	0.731	0.813	0.635339	0.0790496
4 h	0.134	0.127	0.128	0.124	0.125	0.12	0.128	0.126571	1.125	1.135	1.304	1.351	1.43	1.255	1.247	1.185	1.12743	0.105896	1.036	1.023	1.141	1.306	1.282	1.071	1.129	1.093	1.00855	0.10632	0.417	0.396	0.366	0.466	0.507	0.454	0.469	0.451	0.314179	0.0451339	1.086	1.061	1.075	1.095	1.14	1.142	1.14	1.133	0.982429	0.033321
5 h	0.131	0.121	0.12	0.121	0.12	0.115	0.125	0.121857	1.451	1.343	1.491	1.623	1.629	1.429	1.434	1.406	1.35389	0.101721	1.315	1.299	1.363	1.419	1.502	1.337	1.453	1.351	1.25802	0.0712128	0.842	0.839	0.773	0.834	0.851	0.889	0.891	0.868	0.726518	0.0375611	1.39	1.325	1.317	1.345	1.405	1.381	1.371	1.382	1.24264	0.0318658
6 h	0.134	0.126	0.125	0.124	0.121	0.119	0.127	0.125143	1.523	1.651	1.653	1.723	1.773	1.618	1.591	1.537	1.50848	0.0859617	1.562	1.542	1.56	1.578	1.693	1.503	1.738	1.532	1.46336	0.0824275	1.161	1.117	1.094	1.189	1.197	1.246	1.199	1.185	1.04836	0.0485504	1.629	1.516	1.513	1.486	1.566	1.56	1.53	1.535	1.41673	0.0436134
7 h	0.134	0.126	0.125	0.122	0.122	0.119	0.128	0.125143	1.797	1.94	1.879	1.888	1.988	1.843	1.807	1.809	1.74373	0.0686262	1.729	1.803	1.832	1.783	1.887	1.699	2.06	1.87	1.70773	0.112114	1.4	1.382	1.312	1.415	1.412	1.51	1.457	1.4	1.28586	0.0570939	1.73	1.886	1.693	1.6	1.786	1.844	1.81	1.874	1.65273	0.0982249
8 h	0.131	0.127	0.128	0.122	0.125	0.121	0.131	0.126429	1.94	2.227	2.107	2.09	2.244	2.141	2.086	2.013	1.97957	0.101258	1.84	2.066	2.037	1.997	2.078	1.927	2.257	2.096	1.91082	0.123584	1.604	1.713	1.601	1.715	1.694	1.746	1.567	1.599	1.52845	0.0688299	1.868	2.077	1.853	1.778	2.018	2.104	1.868	2.12	1.83432	0.133569
9 h	0.136	0.129	0.125	0.125	0.121	0.118	0.127	0.125857	1.96	2.398	2.282	2.329	2.497	2.496	2.318	2.155	2.17852	0.179201	1.928	2.298	2.259	2.151	2.373	2.144	2.421	2.243	2.10127	0.154614	1.776	1.978	1.905	1.979	1.905	1.985	1.832	1.806	1.76989	0.0830589	2.025	2.282	2.168	1.817	2.251	2.237	1.95	2.287	2.00127	0.175912
10 h	0.134	0.127	0.127	0.124	0.124	0.12	0.13	0.126571	2.05	2.5	2.676	2.643	2.788	2.908	2.5	2.338	2.4238	0.269729	2.007	2.475	2.574	2.466	2.526	2.356	2.655	2.467	2.31418	0.19594	1.911	2.23	2.268	2.283	2.213	2.245	2.096	2.157	2.0488	0.123023	2.105	2.493	2.419	2.269	2.543	2.42	2.322	2.54	2.2623	0.150589
11 h	0.134	0.129	0.124	0.121	0.123	0.119	0.128	0.125429	2.184	2.775	2.82	2.807	2.94	3.136	2.682	2.55	2.61132	0.282197	2.124	2.635	2.849	2.791	2.728	2.682	2.931	2.64	2.54707	0.244512	2.014	2.342	2.424	2.498	2.409	2.527	2.369	2.299	2.23482	0.159137	2.2	2.647	2.583	2.344	2.804	2.613	2.525	2.763	2.43445	0.203236
12 h	0.135	0.131	0.13	0.123	0.12	0.118	0.125	0.126	2.213	2.902	3.084	3.017	3.148	3.254	2.863	2.695	2.771	0.327253	2.141	2.723	2.946	2.904	2.888	2.936	3.058	3.033	2.70263	0.295896	2.085	2.501	2.599	2.77	2.705	2.866	2.463	2.415	2.4245	0.244686	2.223	2.807	2.832	2.46	3.085	2.908	2.626	2.928	2.60763	0.2813
13 h	0.13	0.128	0.128	0.122	0.125	0.118	0.128	0.125571	2.228	3.058	3.096	3.148	3.275	3.131	2.982	2.86	2.84668	0.324481	2.137	2.828	3.165	2.989	3.023	3.158	3.02	3.074	2.79868	0.335339	2.101	2.658	2.901	2.996	2.916	3.126	2.63	2.537	2.60755	0.325007	2.197	2.938	2.996	2.78	3.18	2.967	2.804	3.112	2.74618	0.304709
14 h	0.145	0.128	0.128	0.125	0.122	0.121	0.129	0.128286	2.231	3.215	3.096	3.21	3.264	3.203	3.095	3.061	2.91859	0.337422	2.119	3.014	3.253	3.204	3.14	3.212	2.946	3.146	2.87596	0.37237	2.092	2.698	2.974	3.04	3.12	3.304	2.754	2.614	2.69621	0.375665	2.18	3.148	3.054	3.007	3.256	3.149	2.977	3.116	2.85759	0.337511
15 h	0.133	0.128	0.129	0.123	0.128	0.12	0.127	0.126857	2.239	3.339	3.17	3.397	3.391	3.424	3.069	3.266	3.03502	0.392628	2.14	3.054	3.372	3.265	3.229	3.268	3.033	3.54	2.98577	0.425374	2.09	2.675	2.948	3.156	3.154	3.34	2.816	2.609	2.72164	0.396989	2.165	3.123	3.188	3.18	3.33	3.226	3.101	2.988	2.91077	0.366273
16 h	0.135	0.133	0.133	0.128	0.127	0.124	0.133	0.130429	2.234	3.431	3.406	3.555	3.338	3.355	2.987	3.575	3.1047	0.443069	2.115	2.809	3.151	3.262	3.011	3.288	3.063	3.49	2.8932	0.419833	2.073	2.589	3.076	3.221	3.225	3.27	2.832	2.656	2.73732	0.416281	2.146	2.86	3.273	3.307	3.342	3.076	2.986	2.997	2.86795	0.385564
17 h	0.134	0.129	0.126	0.122	0.126	0.12	0.132	0.127	2.202	2.93	3.221	3.505	3.543	3.4	2.962	3.045	2.974	0.434623	2.096	2.691	3.238	3.027	2.979	3.298	3.087	2.919	2.78988	0.381382	2.061	2.613	2.923	3.223	3.058	3.235	2.873	2.671	2.70512	0.386311	2.093	2.697	3.299	3.117	3.406	3.07	2.968	2.984	2.82725	0.409149
18 h	0.134	0.128	0.127	0.126	0.124	0.122	0.131	0.127429	2.161	2.867	3.301	3.522	3.679	3.488	3.039	2.892	2.9912	0.490552	2.05	2.71	3.346	3.378	3.153	3.404	3.139	2.872	2.87907	0.458443	2.009	2.649	2.809	3.168	3.114	3.183	2.962	2.66	2.69182	0.391362	2.024	2.736	3.316	3.115	3.524	3.122	2.97	3.061	2.85607	0.451546
19 h	0.136	0.129	0.126	0.127	0.126	0.12	0.132	0.128	2.135	2.799	3.681	3.548	3.673	3.524	3.07	2.865	3.03388	0.546899	2.019	2.698	3.1	3.472	3.302	3.411	3.145	2.861	2.873	0.476117	1.954	2.645	2.792	3.205	3.139	3.252	3.008	2.658	2.70362	0.427364	1.952	2.729	3.665	3.25	3.552	3.173	2.973	3.054	2.9155	0.53447
20 h	0.137	0.132	0.13	0.128	0.126	0.126	0.135	0.130571	2.112	2.831	3.711	3.537	3.498	3.552	3.118	2.869	3.02293	0.535362	1.987	2.724	3.658	3.442	3.326	3.411	3.191	2.873	2.94593	0.536079	1.897	2.647	2.81	3.227	3.168	3.229	3.086	2.642	2.70768	0.45289	1.899	2.722	3.718	3.273	3.585	3.21	2.996	3.089	2.93093	0.566132
21 h	0.151	0.13	0.127	0.129	0.125	0.123	0.129	0.130571	2.073	2.814	3.791	3.482	3.505	3.623	3.133	2.861	3.02968	0.563998	1.924	2.702	3.353	3.306	3.286	3.407	3.158	2.872	2.87043	0.500515	1.794	2.645	2.793	3.303	3.221	3.264	3.086	2.669	2.7163	0.501859	1.79	2.689	3.748	3.287	3.523	3.213	3.016	3.072	2.91168	0.599136
22 h	0.132	0.133	0.131	0.13	0.126	0.122	0.132	0.129429	2.028	2.806	3.822	3.634	3.561	3.636	3.163	2.889	3.06295	0.60025	1.878	2.704	3.722	3.482	3.213	3.373	3.226	2.927	2.9362	0.574028	1.715	2.651	2.824	3.283	3.235	3.308	3.124	2.628	2.71657	0.534283	1.711	2.674	3.773	3.287	3.484	3.261	3.028	3.073	2.90695	0.626282
23 h	0.134	0.131	0.129	0.13	0.126	0.125	0.134	0.129857	1.978	2.823	3.778	3.632	3.514	3.639	3.213	2.944	3.06027	0.59909	1.789	2.681	3.792	3.599	2.954	3.396	3.241	3.002	2.92689	0.626281	1.575	2.63	2.819	3.362	3.311	3.352	3.14	2.652	2.72527	0.600565	1.585	2.622	3.88	3.34	3.35	3.313	3.055	3.134	2.90502	0.683147
24 h	0.133	0.127	0.127	0.127	0.123	0.121	0.131	0.127	1.937	2.8	3.572	3.626	3.612	3.646	3.216	2.917	3.03875	0.599363	1.697	2.665	3.793	3.603	3.005	3.418	3.228	3.032	2.92813	0.655301	1.5	2.618	2.787	3.351	3.323	3.366	3.156	2.629	2.71425	0.628279	1.392	2.591	3.828	3.342	3.581	3.317	3.062	3.125	2.90275	0.756489

## Sheet: d. Raw data Fig 9B
Time	M9 glucose (control)									D23580							D23580 cysSchr::frt							D23580 cysSpBT1::frt							D23580 ΔpBT1
	1	2	3	4	5	6	7	8	Average	1	2	3	4	5	[(Average) - (Average control)]	Standard deviation	1	2	3	4	5	[(Average) - (Average control)]	Standard deviation	1	2	3	4	5	[(Average) - (Average control)]	Standard deviation	1	2	3	4	5	[(Average) - (Average control)]	Standard deviation
0 h	0.115	0.102	0.106	0.109	0.104	0.106	0.11	0.108	0.1075	0.108	0.103	0.114	0.117	0.114	0.0037	0.00563028	0.106	0.123	0.124	0.118	0.115	0.0097	0.00725948	0.127	0.11	0.117	0.139	0.112	0.0135	0.0120208	0.133	0.119	0.143	0.118	0.102	0.0155	0.0156684
1 h	0.106	0.099	0.102	0.101	0.098	0.101	0.114	0.109	0.10375	0.119	0.114	0.115	0.123	0.12	0.01445	0.00370135	0.116	0.122	0.119	0.118	0.129	0.01705	0.00506952	0.11	0.116	0.113	0.132	0.113	0.01305	0.00875785	0.115	0.109	0.133	0.118	0.121	0.01545	0.00889944
2 h	0.109	0.104	0.105	0.103	0.101	0.104	0.116	0.107	0.106125	0.132	0.126	0.133	0.139	0.136	0.027075	0.00486826	0.13	0.14	0.137	0.136	0.142	0.030875	0.00458258	0.117	0.121	0.12	0.137	0.117	0.016275	0.00835464	0.128	0.133	0.149	0.13	0.131	0.028075	0.00846759
3 h	0.108	0.104	0.106	0.103	0.101	0.103	0.114	0.107	0.10575	0.153	0.148	0.156	0.158	0.154	0.04805	0.00376829	0.157	0.166	0.156	0.16	0.161	0.05425	0.003937	0.116	0.124	0.119	0.137	0.118	0.01705	0.00846759	0.145	0.149	0.163	0.144	0.146	0.04365	0.00782943
4 h	0.107	0.105	0.106	0.104	0.101	0.104	0.114	0.109	0.10625	0.218	0.207	0.21	0.198	0.199	0.10015	0.00826438	0.22	0.232	0.204	0.212	0.234	0.11415	0.0128374	0.117	0.124	0.124	0.137	0.123	0.01875	0.00731437	0.187	0.191	0.214	0.201	0.199	0.09215	0.0104307
5 h	0.107	0.103	0.106	0.104	0.101	0.104	0.114	0.108	0.105875	0.346	0.345	0.362	0.323	0.329	0.235125	0.015411	0.359	0.378	0.352	0.353	0.371	0.256725	0.0114586	0.121	0.12	0.127	0.141	0.126	0.021125	0.00839643	0.316	0.32	0.334	0.318	0.367	0.225125	0.0213307
6 h	0.107	0.104	0.105	0.104	0.102	0.104	0.114	0.109	0.106125	0.575	0.563	0.586	0.575	0.581	0.469875	0.00860233	0.597	0.603	0.601	0.641	0.644	0.511075	0.0232207	0.125	0.124	0.13	0.149	0.133	0.026075	0.0100846	0.588	0.59	0.602	0.6	0.587	0.487275	0.00705691
7 h	0.109	0.107	0.106	0.105	0.101	0.104	0.114	0.11	0.107	0.826	0.819	0.848	0.842	0.849	0.7298	0.0135536	0.847	0.852	0.846	0.887	0.926	0.7646	0.0347894	0.124	0.131	0.135	0.153	0.139	0.0294	0.0108074	0.913	1.026	0.877	0.832	0.822	0.787	0.0823134
8 h	0.108	0.104	0.105	0.105	0.101	0.104	0.114	0.11	0.106375	1.013	1.004	1.044	1.054	1.064	0.929425	0.0260998	1.034	1.049	1.044	1.108	1.137	0.968025	0.0454126	0.136	0.134	0.143	0.165	0.149	0.039025	0.0124619	1.048	1.05	1.058	1.038	1.051	0.942625	0.0072111
9 h	0.108	0.102	0.104	0.104	0.101	0.104	0.114	0.11	0.105875	1.15	1.14	1.192	1.212	1.225	1.07793	0.037486	1.171	1.201	1.201	1.267	1.3	1.12213	0.0534135	0.147	0.149	0.156	0.188	0.163	0.054725	0.016562	1.198	1.211	1.23	1.209	1.226	1.10892	0.0131034
10 h	0.108	0.102	0.105	0.104	0.101	0.103	0.115	0.11	0.106	1.223	1.213	1.259	1.309	1.325	1.1598	0.0500919	1.237	1.291	1.303	1.369	1.402	1.2144	0.065466	0.18	0.183	0.188	0.209	0.189	0.0838	0.0113446	1.298	1.319	1.343	1.33	1.35	1.222	0.0205791
11 h	0.107	0.102	0.103	0.102	0.099	0.102	0.112	0.108	0.104375	1.19	1.183	1.216	1.307	1.322	1.13923	0.0660931	1.203	1.269	1.298	1.368	1.391	1.20142	0.0760112	0.222	0.231	0.234	0.268	0.246	0.135825	0.0177539	1.312	1.326	1.363	1.361	1.391	1.24622	0.0315801
12 h	0.11	0.104	0.104	0.103	0.101	0.103	0.112	0.109	0.10575	1.127	1.128	1.167	1.235	1.25	1.07565	0.0583035	1.142	1.2	1.228	1.288	1.301	1.12605	0.0652625	0.369	0.376	0.398	0.411	0.403	0.28565	0.0180361	1.246	1.26	1.297	1.304	1.342	1.18405	0.0380289
13 h	0.11	0.102	0.105	0.103	0.101	0.103	0.113	0.108	0.105625	1.102	1.102	1.163	1.189	1.201	1.04577	0.0471413	1.13	1.173	1.181	1.248	1.268	1.09437	0.0568287	0.554	0.586	0.606	0.609	0.592	0.483775	0.0219727	1.188	1.205	1.237	1.23	1.265	1.11937	0.0297405
14 h	0.109	0.102	0.105	0.104	0.101	0.104	0.113	0.109	0.105875	1.118	1.116	1.178	1.196	1.205	1.05672	0.0427528	1.143	1.184	1.187	1.246	1.272	1.10052	0.0518874	0.743	0.777	0.786	0.813	0.791	0.676125	0.0255147	1.184	1.205	1.228	1.22	1.25	1.11153	0.0247548
15 h	0.11	0.103	0.104	0.104	0.101	0.103	0.115	0.109	0.106125	1.125	1.123	1.184	1.2	1.213	1.06288	0.0423497	1.149	1.186	1.192	1.246	1.275	1.10347	0.0503518	0.916	0.945	0.96	0.975	0.946	0.842275	0.0218472	1.19	1.204	1.231	1.219	1.248	1.11228	0.022634
16 h	0.111	0.103	0.106	0.103	0.102	0.103	0.115	0.109	0.1065	1.127	1.127	1.187	1.202	1.215	1.0651	0.0419023	1.155	1.188	1.193	1.25	1.275	1.1057	0.0489867	1.053	1.071	1.088	1.103	1.056	0.9677	0.0212767	1.188	1.211	1.235	1.222	1.25	1.1147	0.0235945
17 h	0.11	0.101	0.104	0.102	0.1	0.103	0.114	0.109	0.105375	1.142	1.14	1.198	1.214	1.223	1.07803	0.0397341	1.161	1.195	1.2	1.256	1.282	1.11343	0.0490887	1.15	1.157	1.177	1.185	1.129	1.05422	0.0222666	1.194	1.216	1.239	1.229	1.254	1.12102	0.022832
18 h	0.112	0.101	0.105	0.101	0.101	0.103	0.114	0.108	0.105625	1.144	1.142	1.201	1.22	1.224	1.08057	0.0403881	1.165	1.199	1.204	1.259	1.283	1.11637	0.0479375	1.189	1.181	1.202	1.223	1.157	1.08477	0.0245112	1.2	1.221	1.241	1.229	1.253	1.12318	0.0201544
19 h	0.112	0.103	0.106	0.103	0.103	0.106	0.113	0.111	0.107125	1.149	1.148	1.207	1.225	1.236	1.08587	0.0419225	1.172	1.208	1.214	1.268	1.293	1.12388	0.0487647	1.174	1.173	1.191	1.229	1.18	1.08228	0.0232659	1.205	1.228	1.25	1.238	1.262	1.12948	0.0217899
20 h	0.113	0.103	0.105	0.103	0.103	0.103	0.112	0.111	0.106625	1.152	1.152	1.211	1.229	1.237	1.08957	0.0414331	1.175	1.209	1.219	1.271	1.298	1.12778	0.0494854	1.139	1.133	1.158	1.205	1.183	1.05697	0.0302622	1.212	1.229	1.256	1.242	1.267	1.13457	0.0217187
21 h	0.113	0.102	0.106	0.105	0.101	0.103	0.113	0.111	0.10675	1.156	1.159	1.216	1.236	1.244	1.09545	0.0420737	1.182	1.216	1.223	1.279	1.301	1.13345	0.048659	1.102	1.115	1.133	1.181	1.152	1.02985	0.0311657	1.215	1.239	1.26	1.247	1.268	1.13905	0.0205597
22 h	0.113	0.102	0.107	0.106	0.103	0.105	0.114	0.113	0.107875	1.159	1.163	1.224	1.243	1.254	1.10073	0.0447806	1.189	1.224	1.233	1.286	1.31	1.14053	0.0489111	1.098	1.114	1.134	1.175	1.149	1.02612	0.0300083	1.22	1.247	1.27	1.257	1.278	1.14653	0.0226119
23 h	0.112	0.103	0.105	0.104	0.102	0.104	0.113	0.112	0.106875	1.165	1.167	1.222	1.245	1.254	1.10372	0.0423592	1.19	1.224	1.233	1.286	1.31	1.14173	0.0486086	1.095	1.113	1.132	1.171	1.149	1.02513	0.0297489	1.224	1.249	1.27	1.258	1.283	1.14992	0.022354
24 h	0.114	0.104	0.106	0.105	0.104	0.106	0.114	0.114	0.108375	1.169	1.173	1.23	1.25	1.259	1.10783	0.0425993	1.193	1.232	1.236	1.293	1.319	1.14622	0.0506784	1.095	1.118	1.132	1.175	1.148	1.02522	0.0302374	1.227	1.254	1.28	1.265	1.287	1.15422	0.0236918

## Sheet: e. Raw data Fig 9C
Biological replicate	4/74	D23580	D23580 ΔpBT1
1	51.2642	8.41571	57.51
2	64.0646	11.2187	49.3344
3	68.2769	9.38082
Mean	61.2019	9.67173	53.4222
Standard deviation	8.86024	1.42394	5.78102
Tukey's multiple comparisons test	Mean Diff.	95.00% CI of diff.	Significant?	Summary	Adjusted p-value
4/74 vs. D23580	51.53	34.96 to 68.1	Yes	***	0.0004
4/74 vs. D23580 ΔpBT1	7.78	-10.74 to 26.3	No	ns	0.4233
D23580 vs. D23580 ΔpBT1	-43.75	-62.27 to -25.23	Yes	**	0.0014

## Sheet: f. Raw data S5 Fig B
Biological replicate	4/74	D23580	D23580 flhA4/74
1	5.8	4.4	4.8
2	6.3	4.7	5
3	6	4.7	4.8
4	6	4.7	5.3
5	5.5	4.3	4.5
6	6.3	4.1	4.8
7	5.5	4.2	4.6
8	5.7	4.5	4.8
9	6	4.3	4.4
10	5.8	4.4	5.5
11	5.5	4.2	4.4
12	6	4.7	5
Tukey's multiple comparisons test	Mean Diff.	95.00% CI of diff.	Significant?	Summary	Adjusted p-value
4/74 vs. D23580	1.433	1.147 to 1.72	Yes	****	<0.0001
4/74 vs. D23580 flhA4/74	1.042	0.7553 to 1.328	Yes	****	<0.0001
D23580 vs. D23580 flhA4/74	-0.3917	-0.678 to -0.1053	Yes	**	0.0055

## Sheet: g. Raw data S5 Fig C
Biological replicate	4/74	SL1344	SL1344 ΔorgA	D23580	D23580 flhA4/74
1	52.3817	37.9035	2.93012	30.1003	28.22
2	53.9799	46.0827	2.36603	33.2028	27.5619
3	46.6468	40.4419	-3.36885	28.408	25.3996
4	50.2194	38.1855	1.70793	25.6816	20.5108
5	53.2278	35.6471	-2.33469	22.5791	15.7161
6	54.074	41.7581	11.6735	37.5274	28.9721
Tukey's multiple comparisons test	Mean Diff.	95.00% CI of diff.	Significant?	Summary
4/74 vs. SL1344	11.75	3.948 to 19.56	Yes	**
4/74 vs. SL1344 ΔorgA	49.59	41.79 to 57.4	Yes	****
4/74 vs. D23580	22.17	14.37 to 29.98	Yes	****
4/74 vs. D23580 flhA4/74	27.36	19.55 to 35.16	Yes	****
SL1344 vs. SL1344 ΔorgA	37.84	30.04 to 45.64	Yes	****
SL1344 vs. D23580	10.42	2.616 to 18.22	Yes	**
SL1344 vs. D23580 flhA4/74	15.61	7.803 to 23.41	Yes	****
SL1344 ΔorgA vs. D23580	-27.42	-35.22 to -19.62	Yes	****
SL1344 ΔorgA vs. D23580 flhA4/74	-22.23	-30.04 to -14.43	Yes	****
D23580 vs. D23580 flhA4/74	5.186	-2.617 to 12.99	No	ns
